# Supplementary material
Source: HighWire-hosted journal article supplement (https://www.cmaj.ca/highwire/filestream/57962/field_highwire_adjunct_files/0/analysisdec6--online_table.pdf)
Supplement: analysisdec6--online_table.pdf [file analysisdec6--online_table.pdf]

**e-Table:** Outcomes of the Canadian Resident Matching Service (CaRMS) match between 1995 and 2004 (inclusive), by sex\*

| Specialty                 | Male applicants                        |                                                | Female applicants                      |                                                | Odds ratio of male:female applicants not being matched to top-ranked discipline (95% CI) |
|---------------------------|----------------------------------------|------------------------------------------------|----------------------------------------|------------------------------------------------|------------------------------------------------------------------------------------------|
|                           | No. ranking discipline as first choice | No. (%) being matched to top-ranked discipline | No. ranking discipline as first choice | No. (%) being matched to top-ranked discipline |                                                                                          |
| Family medicine           | 1575                                   | 1483 (94)                                      | 2063                                   | 1998 (97)                                      | 1.9 (1.4-2.6)                                                                            |
| Surgery†                  | 1749                                   | 1182 (68)                                      | 555                                    | 371 (67)                                       | 1.0 (0.8-1.3)                                                                            |
| Internal medicine‡        | 969                                    | 862 (89)                                       | 695                                    | 631 (91)                                       | 1.2 (0.9-1.7)                                                                            |
| Obstetrics and gynecology | 103                                    | 92 (89)                                        | 380                                    | 324 (85)                                       | 0.7 (0.4-1.4)                                                                            |
| Anesthesia                | 358                                    | 311 (87)                                       | 210                                    | 180 (86)                                       | 0.9 (0.6-1.5)                                                                            |
| Emergency medicine        | 209                                    | 117 (56)                                       | 101                                    | 70 (69)                                        | 1.8 (1.1-2.9)                                                                            |
| Paediatrics               | 268                                    | 208 (78)                                       | 581                                    | 426 (73)                                       | 0.8 (0.6-1.1)                                                                            |
| Radiology                 | 398                                    | 265 (67)                                       | 198                                    | 144 (73)                                       | 1.3 (0.9-1.9)                                                                            |
| Psychiatry                | 312                                    | 283 (91)                                       | 410                                    | 389 (95)                                       | 1.9 (1.1-3.4)                                                                            |
| All specialties§          | 4366                                   | 3320 (76)                                      | 3130                                   | 2535 (81)                                      | 1.3 (1.2-1.5)                                                                            |
| All disciplines¶          | 5941                                   | 4803 (81)                                      | 5193                                   | 4533 (87)                                      | 1.6 (1.5-1.8)                                                                            |

\*This table shows the top-ranked disciplines and success rates among male and female applicants. Column 2 gives the number of male applicants who ranked each discipline as their top choice in the match; column 3 gives the number of these applicants who were matched to this same top-ranked discipline (although not necessarily to their top-ranked location). Columns 4 and 5 give the corresponding values for the female applicants. The final column compares the odds of being male and not being matching to their top-ranked discipline with the corresponding odds among female applicants; a value of 1.9 for family medicine, for example, would indicate that male applicants who ranked a family medicine program as their top choice had odds of not being matched to this program (regardless of its location) that were twice as high as the corresponding odds among the female applicants.

†Includes general surgery, cardiac surgery, orthopedic surgery, neurosurgery, plastic surgery, urology, and ophthalmology.

‡Excludes neurology.

§Includes all specialties listed in the table except family medicine.

¶Includes all disciplines listed in the table.
